# Supplementary material
Source: PubMed Central journal article supplement (PMC134237)
Supplement: nar_30_16_3624__2.pdf [file nar_30_16_3624__2.pdf]

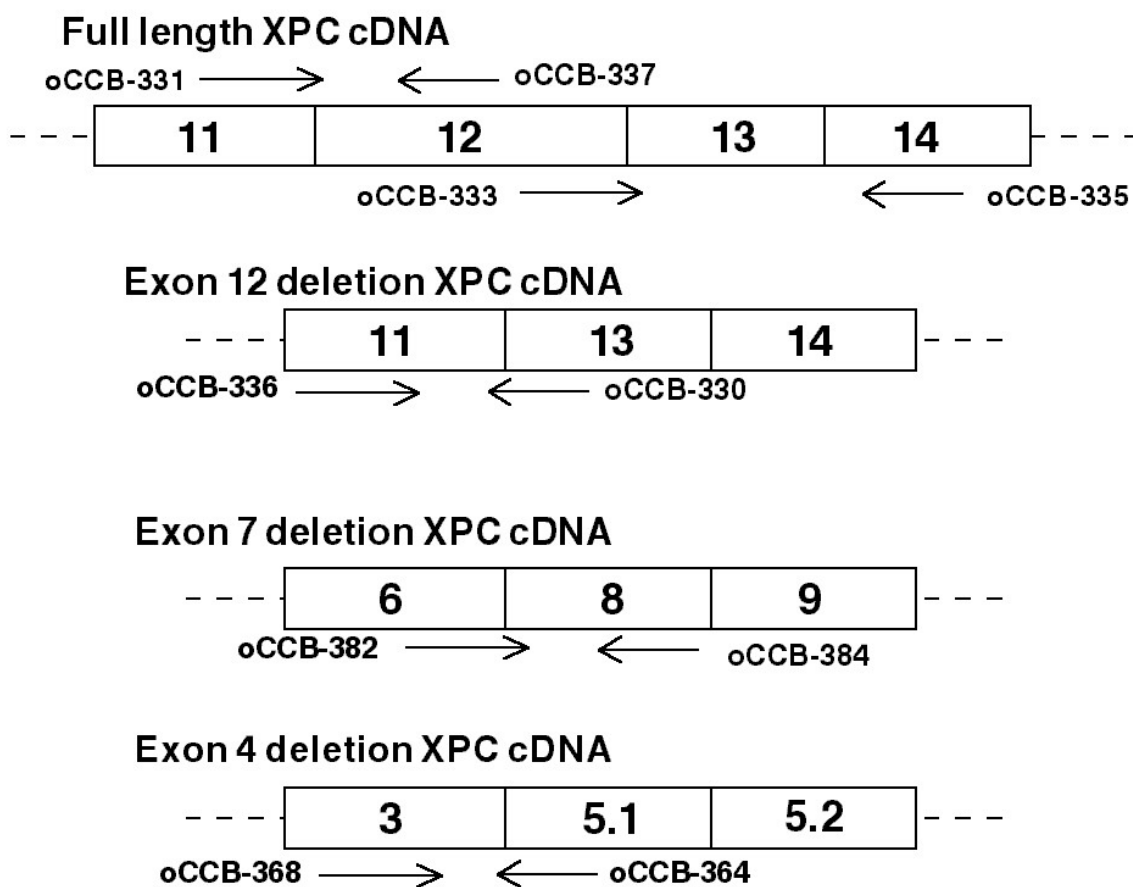

Figure S1. Primers used for real time quantitative reverse transcription polymerase chain reaction assays for *XPC* mRNA. A primer spanning the junction of adjacent exons was paired with a primer contained within another exon. Primer pairs were developed to measure full length *XPC* cDNA (including exon 12), deleting exon 12, deleting exon 7 or deleting exon 4.
